# Supplementary material for: Endothelial, pericyte and tumor cell expression in glioblastoma identifies fibroblast activation protein (FAP) as an excellent target for immunotherapy
Source: PubMed Central journal article supplement (PMC7557106; doi:10.1002/cti2.1191), 2020-10-14
Supplement: CTI2-9-e1191-s001.pdf [file CTI2-9-e1191-s001.pdf]

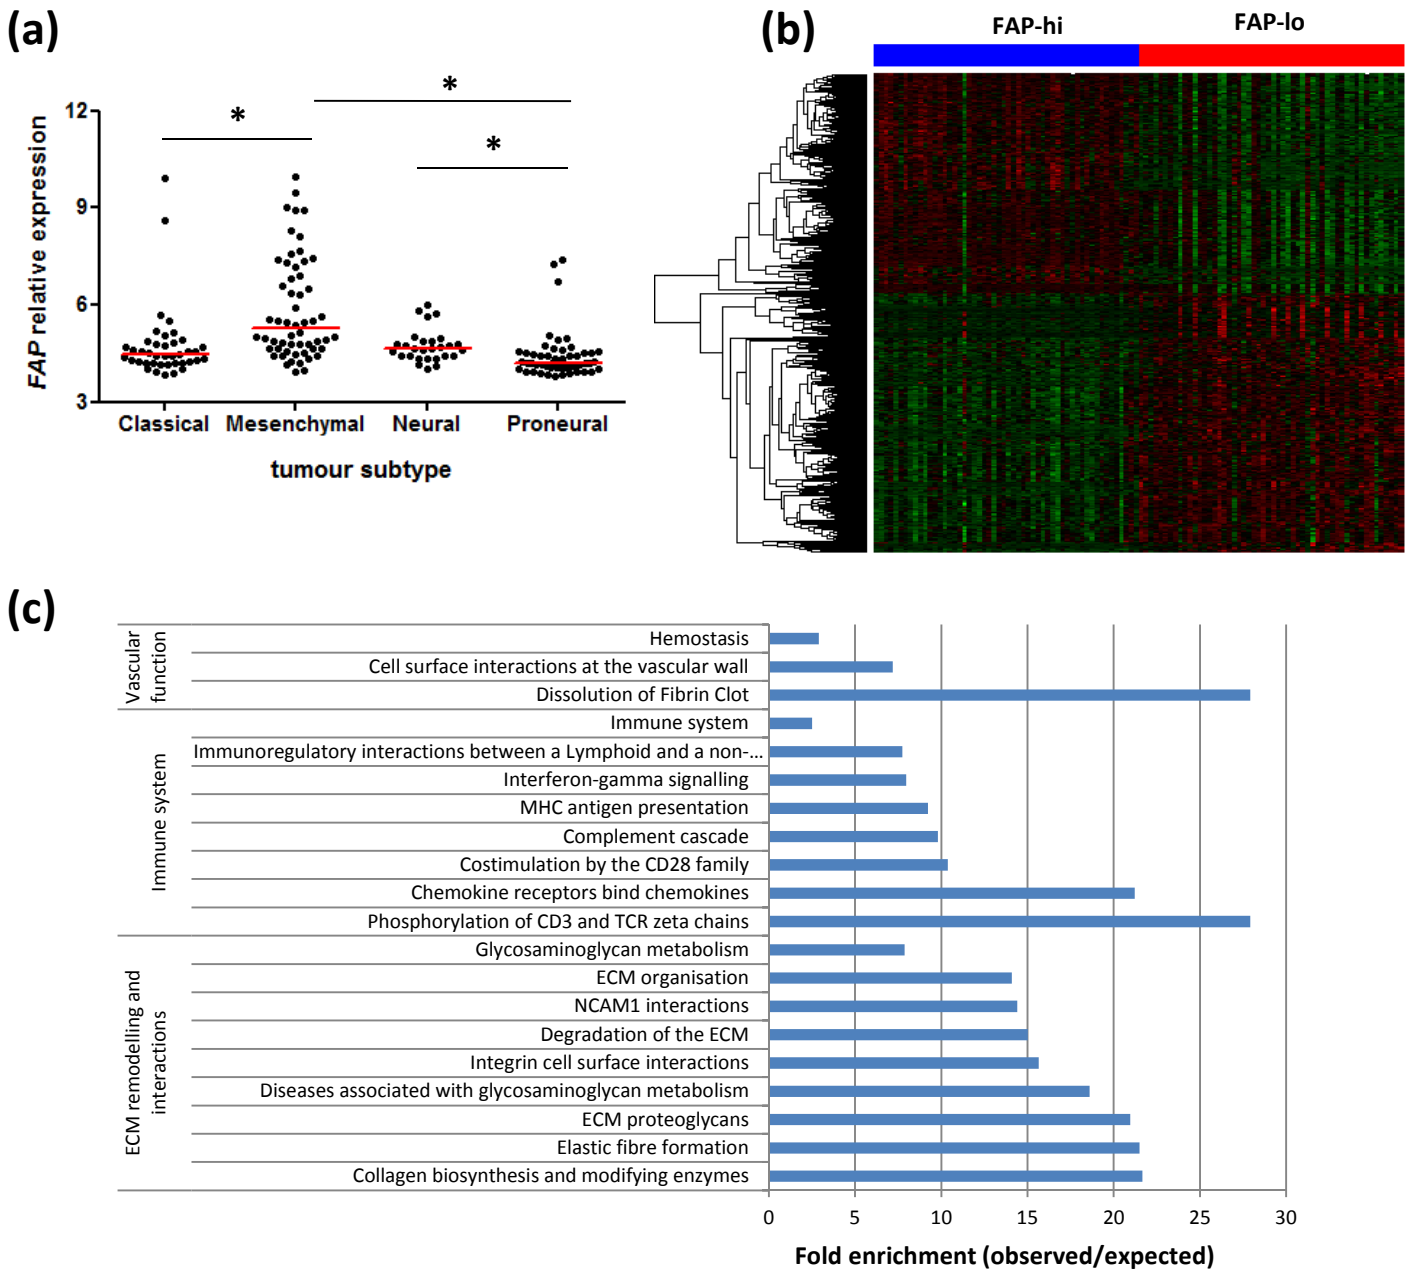

**Supplementary figure 1 – FAP overexpression associates with the mesenchymal phenotype and genes associated with invasion, inflammation and vascular function.** Microarray data from TCGA GBM dataset was analysed using R. **(a)**: Glioblastoma specimens were divided into 4 subtypes on the basis of multi-gene signatures and *FAP* expression compared. Differences between the groups were significant by Kruskal-Wallis test ( $p < 0.0001$ ); pairwise comparisons significant by Dunn's post-test are indicated by asterisks. **(b)**: Heatmap showing genes differentially expressed between *FAP*-hi and *FAP*-lo tumours; a total of 865 genes showed >2-fold difference between the groups, using an FDR cut-off of <0.05. **(c)**: To identify gene pathways associated with high *FAP* expression in tumours, the list of genes most overexpressed (>3-fold) by the *FAP*-hi group was analysed by PANTHER Overrepresentation test using the Reactome Pathways annotation and Fisher's Exact test with FDR multiple test correction. All results have FDR < 0.05. Pathways associated with high *FAP* expression are categorised into 3 functional subsets, and the fold enrichment of each pathway (observed/expected) is shown.

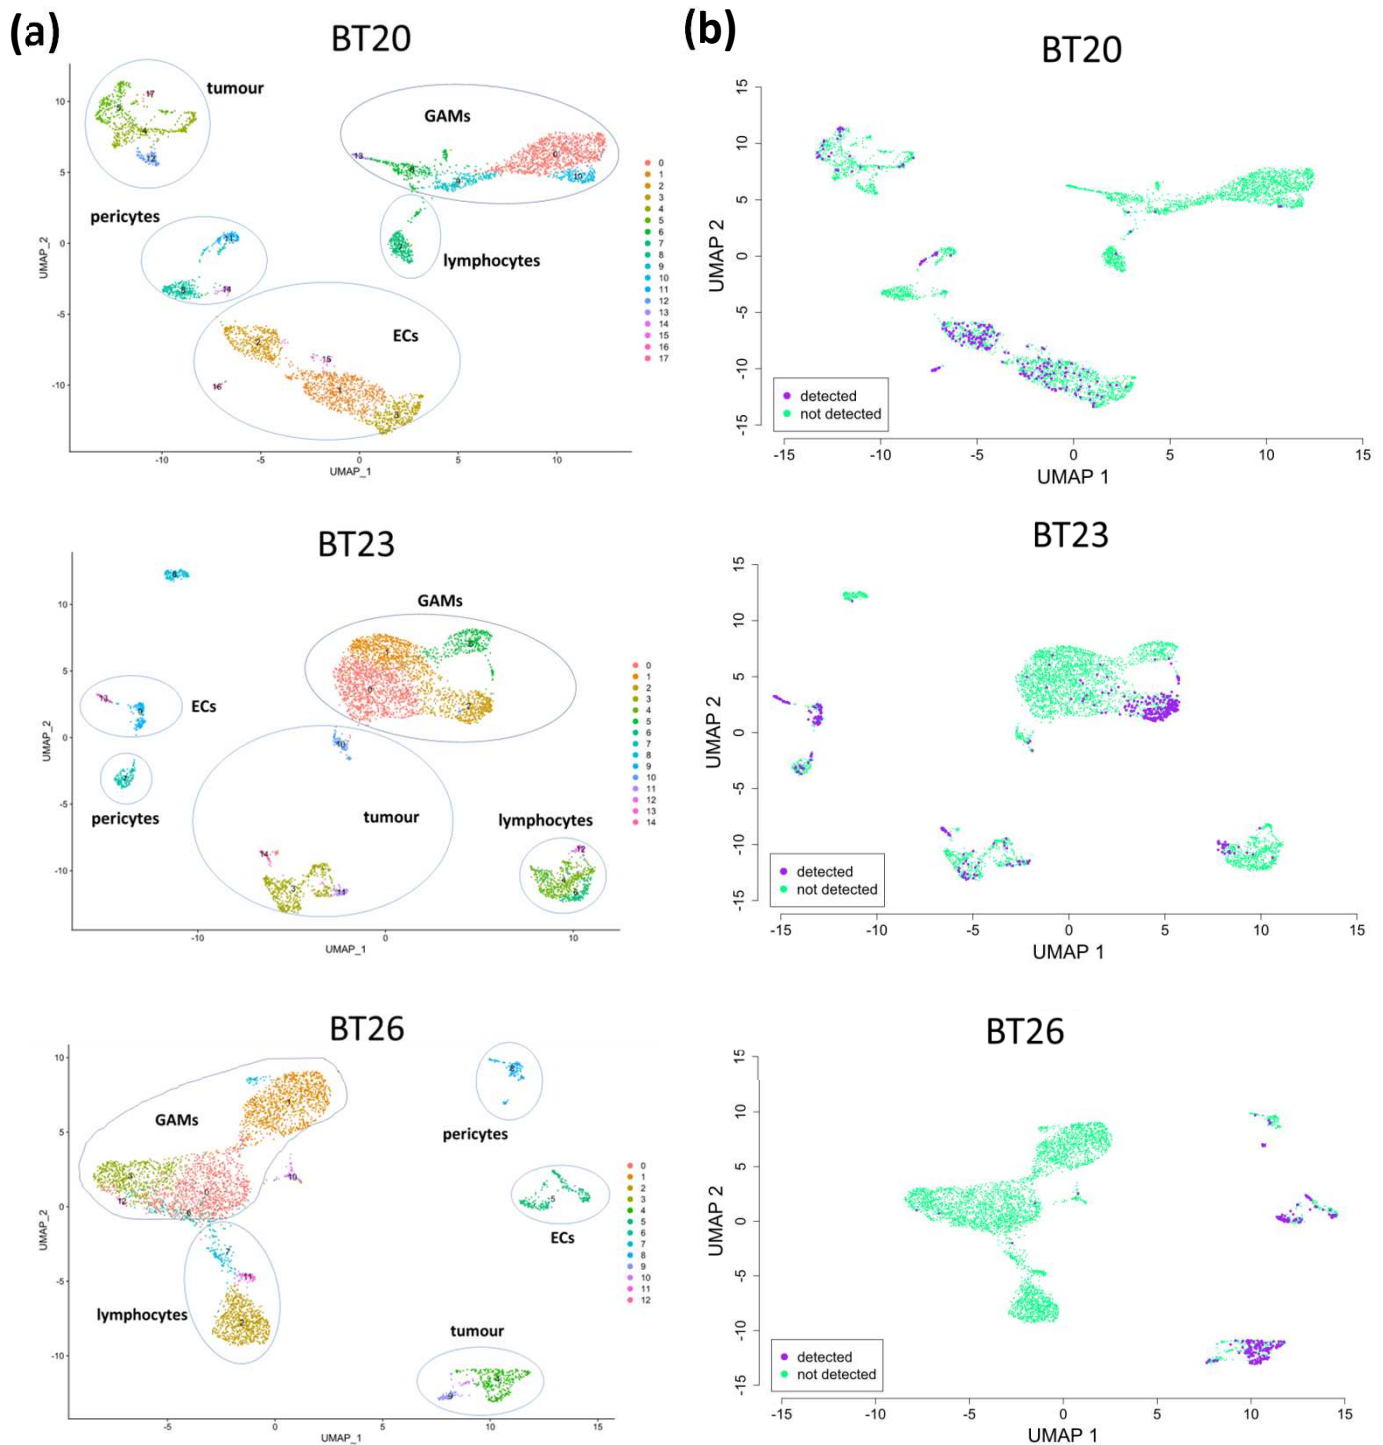

**Supplementary figure 2 – Single cell transcriptomic analysis of three glioblastoma specimens.** Fresh tumour tissue specimens from three patients (BT20, BT23, BT26) were dissociated to single cell suspensions and analysed by scRNAseq. **(a):** UMAP plots for each specimen showing unsupervised clustering of cells, with the cell type of each cluster annotated according to the presence of marker genes. **(b):** UMAP plots were coloured according to whether FAP transcripts were expressed (purple) or not (green) in individual cells.
