# Supplementary material for: Endothelial, pericyte and tumor cell expression in glioblastoma identifies fibroblast activation protein (FAP) as an excellent target for immunotherapy
Source: PubMed Central journal article supplement (PMC7557106; doi:10.1002/cti2.1191), 2020-10-14
Supplement: CTI2-9-e1191-s002.pdf [file CTI2-9-e1191-s002.pdf]

**Supplementary table 1:** Characteristics of FFPE glioblastoma specimens and outcome of FAP IHC

| Patient | Gender | Primary/<br>recurrence | Diagnosis/pathology details                                                            | FAP IHC result |           |       |
|---------|--------|------------------------|----------------------------------------------------------------------------------------|----------------|-----------|-------|
|         |        |                        |                                                                                        | Breadth        | Intensity | IRS ‡ |
| 1       | M      | Primary                | Glioblastoma                                                                           | 1.5            | 2         | 3     |
|         |        | Recurrence             | Glioblastoma                                                                           | 2              | 2         | 4     |
| 2       | F      | Primary                | Glioblastoma                                                                           | 1              | 2         | 2     |
|         |        | Recurrence             | Glioblastoma showing treatment-related changes                                         | 2              | 1         | 2     |
| 3       | F      | Primary                | Glioblastoma with areas of oligodendroglial differentiation                            | 2              | 3         | 6     |
| 3       |        | Recurrence             | Glioblastoma showing treatment-related changes and oligodendroglial differentiation    | 3              | 1         | 3     |
| 4       | M      | Recurrence             | Glioblastoma showing sarcomatoid & small cell components and treatment-related changes | 2              | 2         | 4     |
| 5       | M      | Primary                | Glioblastoma                                                                           | 2              | 2         | 4     |
| 6       | M      | Primary                | Glioblastoma                                                                           | 4              | 1         | 4     |
| 7       | M      | Recurrence             | Glioblastoma showing treatment-related changes                                         | 1.5            | 1.5       | 2.5   |
| 8       | F      | Primary                | Glioblastoma with prominent gemistocytic component                                     | 1              | 2         | 2     |
| 9       | F      | Recurrence             | Glioblastoma with prominent gemistocytic component                                     | 2              | 3         | 6     |
| 10      | F      | Recurrence (PM) †      | Glioblastoma                                                                           | 1              | 3         | 3     |
| 11      | M      | Recurrence (PM)        | Glioblastoma                                                                           | 1              | 3         | 3     |
| 12      | M      | Primary                | Glioblastoma                                                                           | 0              | 0         | 0     |
| 13      | M      | Primary                | <b>Gliosarcoma</b>                                                                     | 3              | 2         | 6     |
| 14      | M      | Primary                | <b>Gliosarcoma</b>                                                                     | 3              | 2         | 6     |
| 15      | M      | Primary                | <b>Gliosarcoma</b>                                                                     | 3              | 3         | 9     |
| 16      | F      | Primary                | Glioblastoma with sarcomatoid and small cell components                                | 0              | 0         | 0     |
|         |        | Recurrence             | Glioblastoma with sarcomatoid and small cell components                                | 2              | 3         | 6     |
| 17      | M      | Primary                | Glioblastoma                                                                           | 2              | 3         | 6     |
|         |        | Recurrence             | Glioblastoma showing treatment-related changes                                         | 2              | 2.5       | 5     |
| 18      | M      | Primary                | Glioblastoma                                                                           | 0              | 0         | 0     |
|         |        | Recurrence             | Glioblastoma                                                                           | 0              | 0         | 0     |
| 19      | M      | Primary                | Glioblastoma with areas of oligodendroglial differentiation                            | 1              | 3         | 3     |
|         |        | Recurrence             | Glioblastoma showing treatment-related changes                                         | 1              | 2.5       | 2.5   |
| 20      | F      | Primary                | Glioblastoma                                                                           | 0              | 0         | 0     |
|         |        | Recurrence             | Glioblastoma with prominent gemistocytic component and treatment-related changes       | 0              | 0         | 0     |
| 21      | F      | Primary                | Glioblastoma with gemistocytic, sarcomatoid and small cell components                  | 1              | 2         | 2     |
| 22      | F      | Recurrence             | <b>Gliosarcoma</b>                                                                     | 3              | 3         | 9     |

† PM: post-mortem; ‡ IRS: ImmunoReactivity Score (obtained by multiplying score for breadth by score for intensity; see Materials and Methods for details)

**Supplementary table 2:** Healthy brain tissue specimen details and FAP IHC outcome

| <b>Donor</b> | <b>Regions examined</b>                                                         | <b>FAP staining in brain parenchyma</b> | <b>FAP staining on CD31+ vessels</b> |
|--------------|---------------------------------------------------------------------------------|-----------------------------------------|--------------------------------------|
| SA0096       | left frontal lobe, left anterior parietal lobe, left basal ganglia              | Negative                                | Negative                             |
| SA0112       | left superior frontal gyrus, left cingulate gyrus, left parietal cortex         | Negative                                | Negative                             |
| SA0214       | left middle frontal gyrus, middle temporal gyrus, left superior parietal lobule | Negative                                | Negative                             |
| CA4          | right frontal lobe, right basal ganglia, right parietal lobe                    | Negative                                | Negative                             |
| CA5          | right frontal lobe, right basal ganglia, right parietal lobe                    | Negative                                | Negative                             |
| CA6          | right frontal lobe, right basal ganglia, right parietal lobe                    | Negative                                | Negative                             |
